# Supplementary material
Source: Springer Nature journal article supplement (https://www.springermedizin.de/resource/supplementary/12885_2013_4232_MOESM3_ESM.pdf/9465826)

Figure S2

### ARHI-CG1 HpB07

#### MALDI-TOF MS

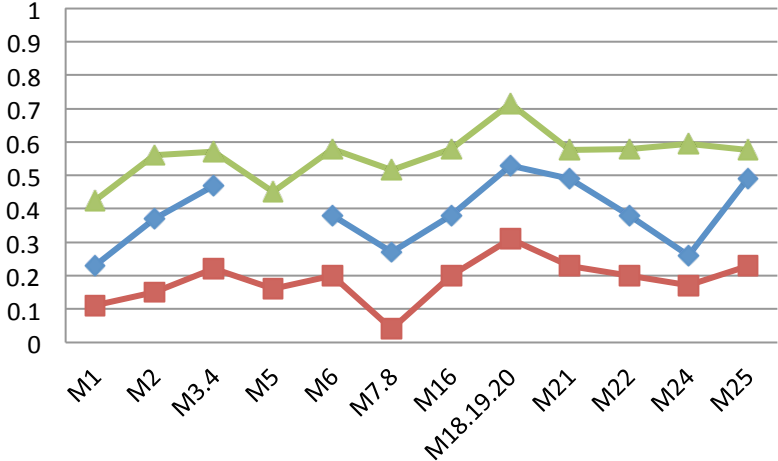

#### Pyrosequencing

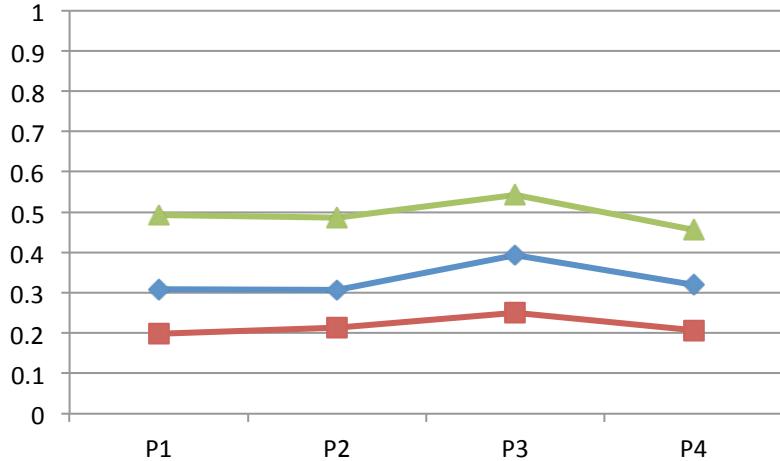

### ZDBF2 HpB05

#### MALDI-TOF MS

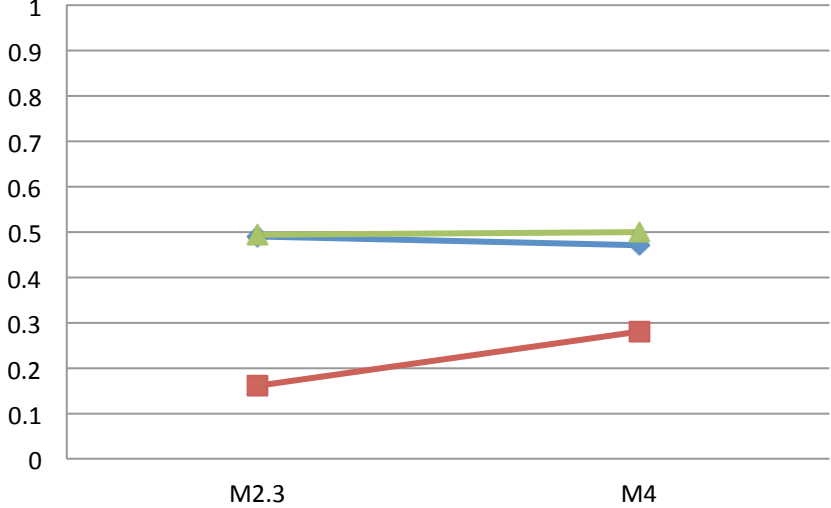

#### Pyrosequencing

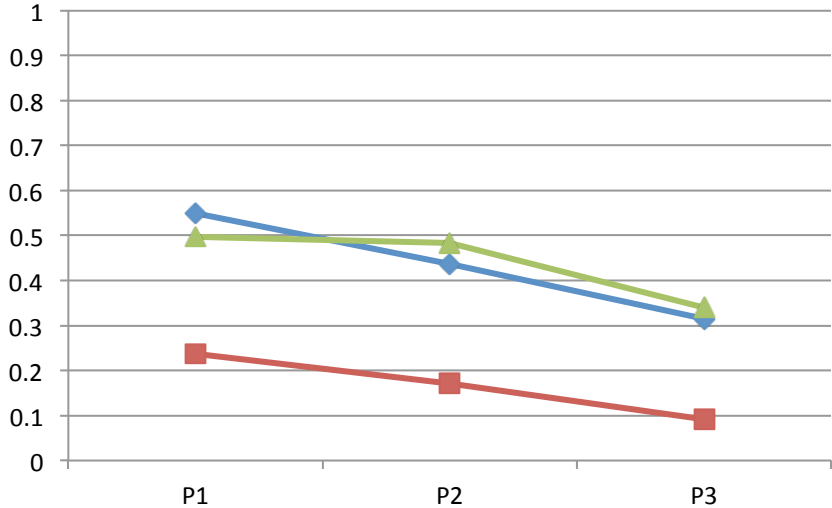

## ZDBF2 HpB09

### MALDI-TOF MS

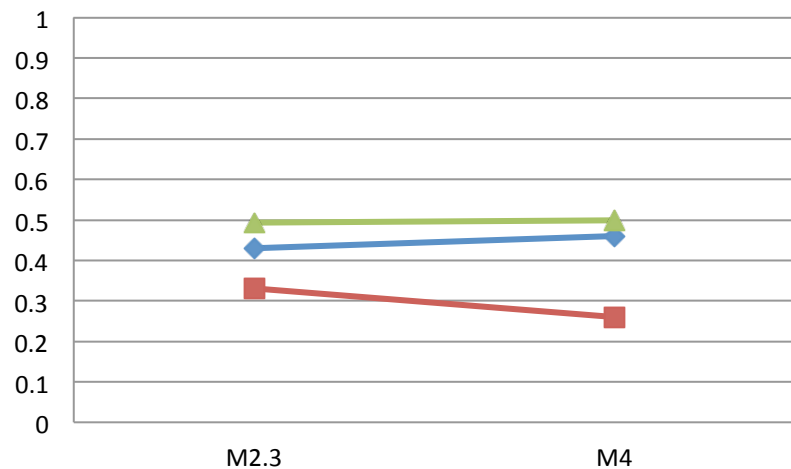

### Pyrosequencing

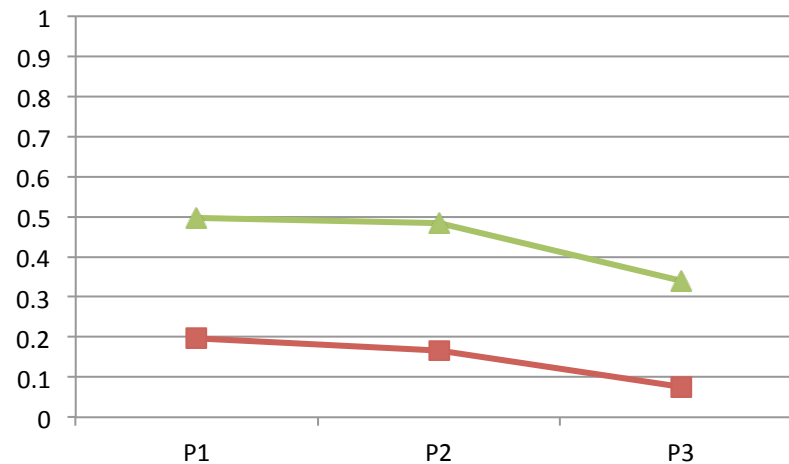

## NAP1L5 HpB05

### MALDI-TOF MS

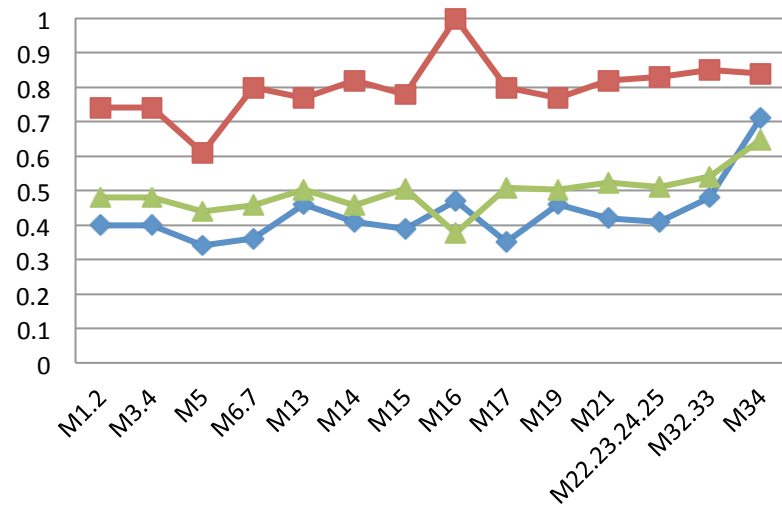

### Pyrosequencing

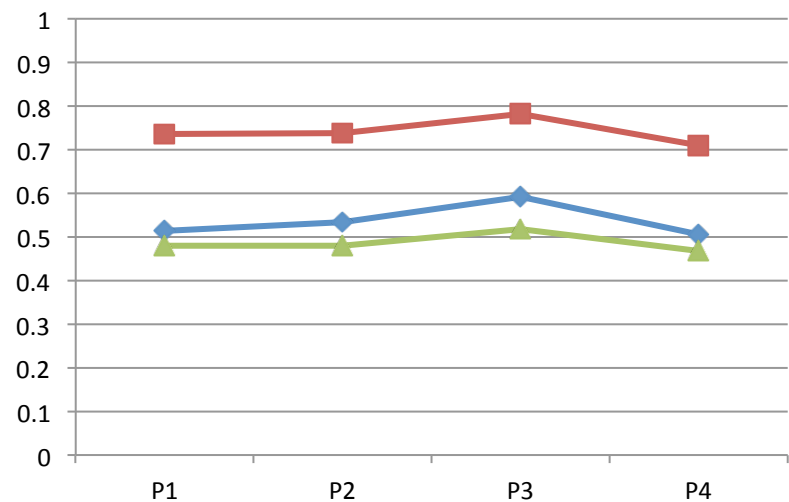

# PEG10 HpB11

## MALDI-TOF MS

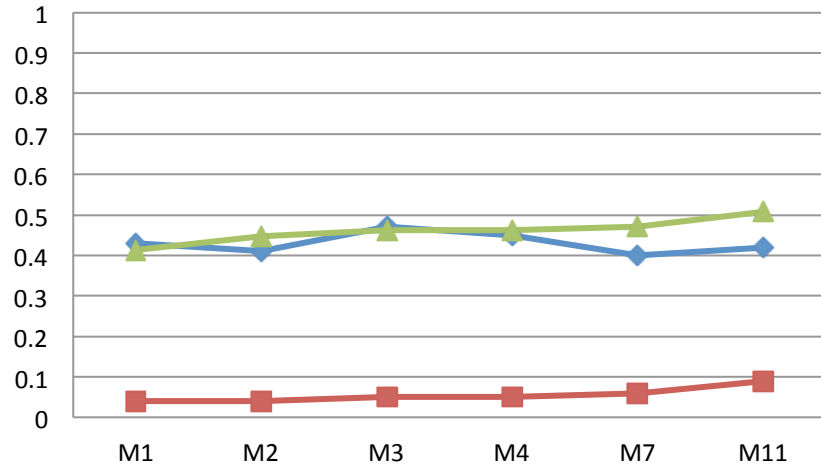

## Pyrosequencing

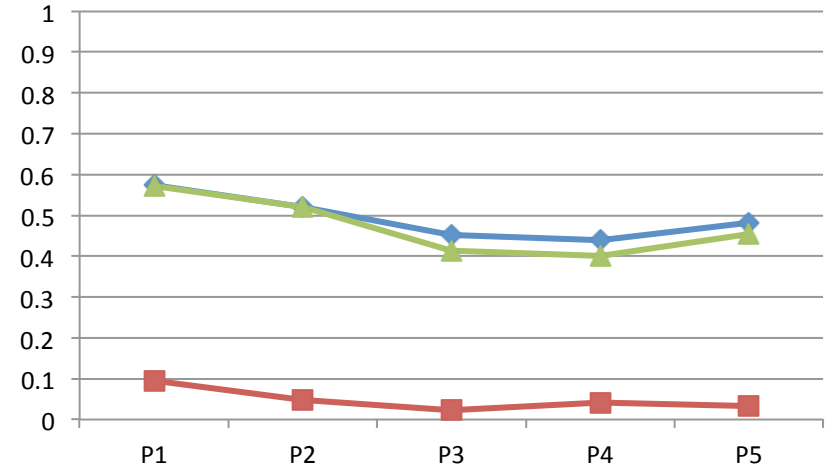

# INPP5FV2 HpB01

## MALDI-TOF MS

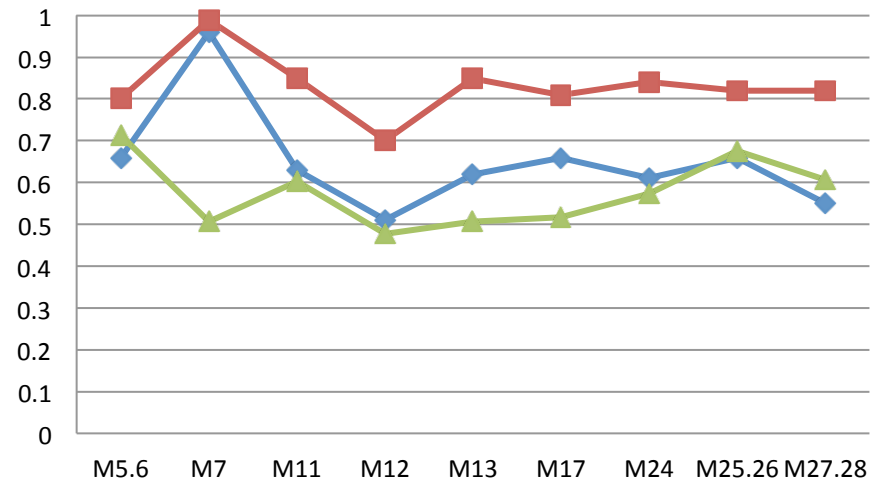

## Pyrosequencing

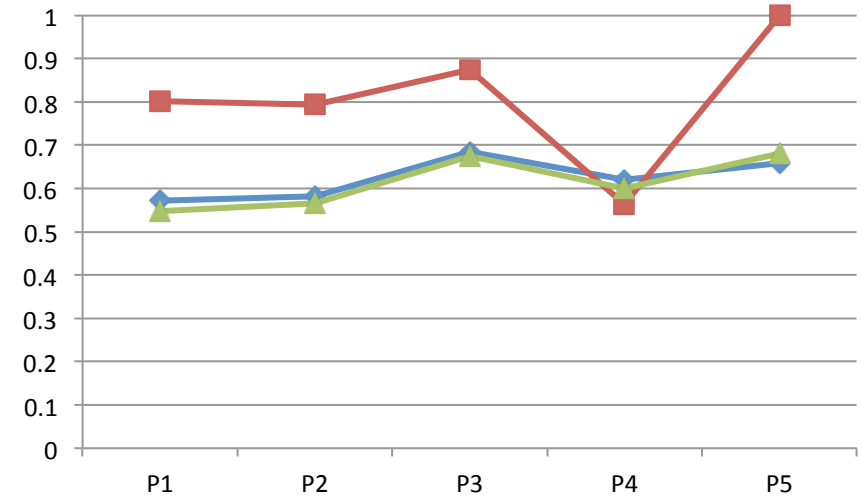

## INPP5FV2 HpB02

### MALDI-TOF MS

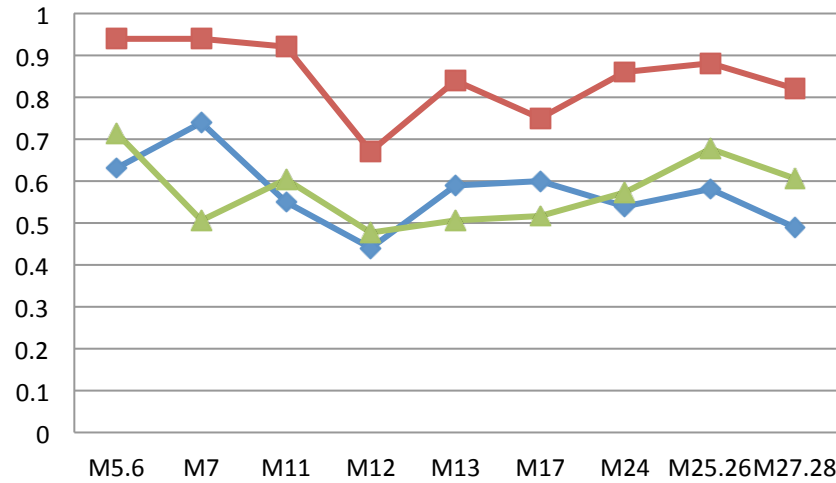

### Pyrosequencing

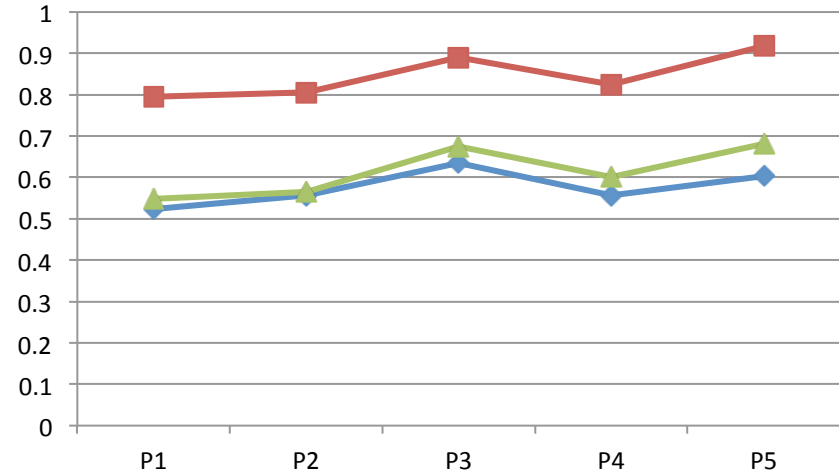

## INPP5FV2 HpB04

### MALDI-TOF MS

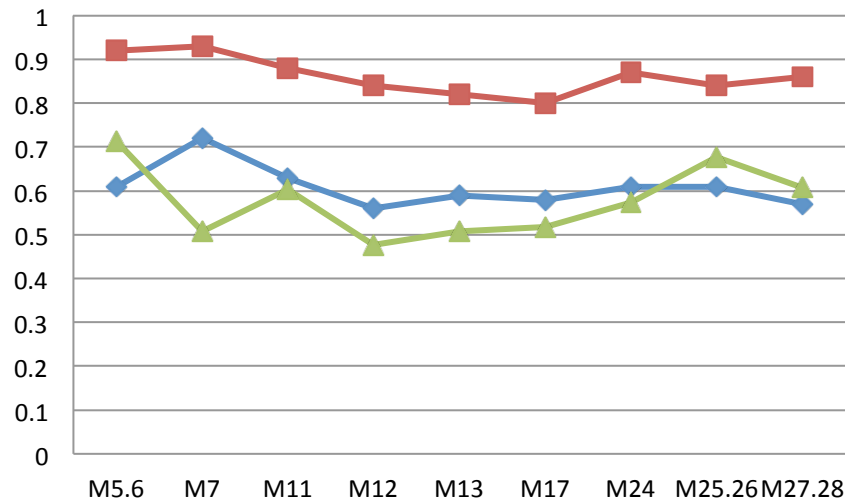

### Pyrosequencing

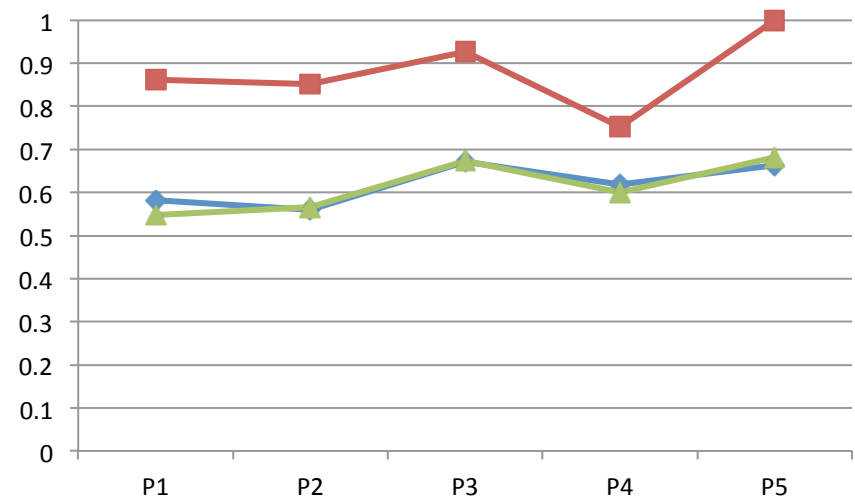

## INPP5FV2 HpB05

### MALDI-TOF MS

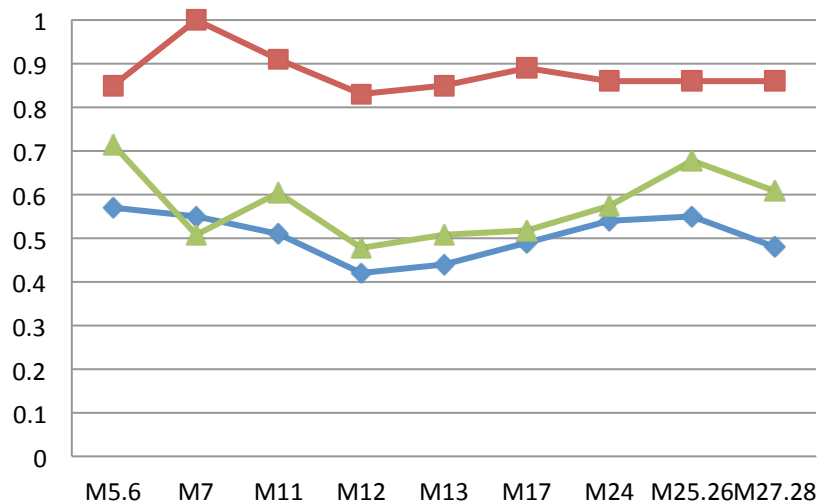

### Pyrosequencing

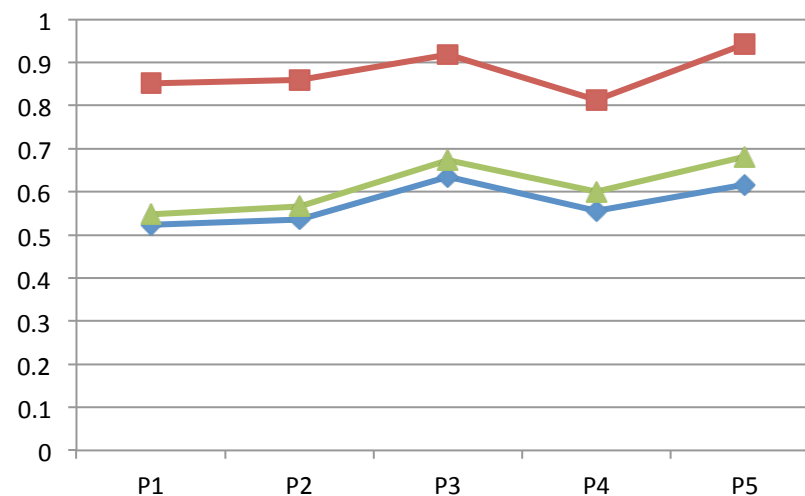

## INPP5FV2 HpB07

### MALDI-TOF MS

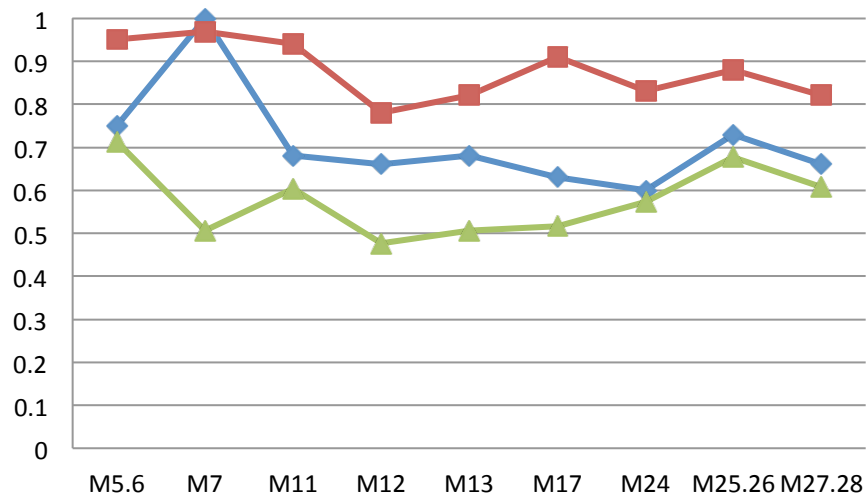

### Pyrosequencing

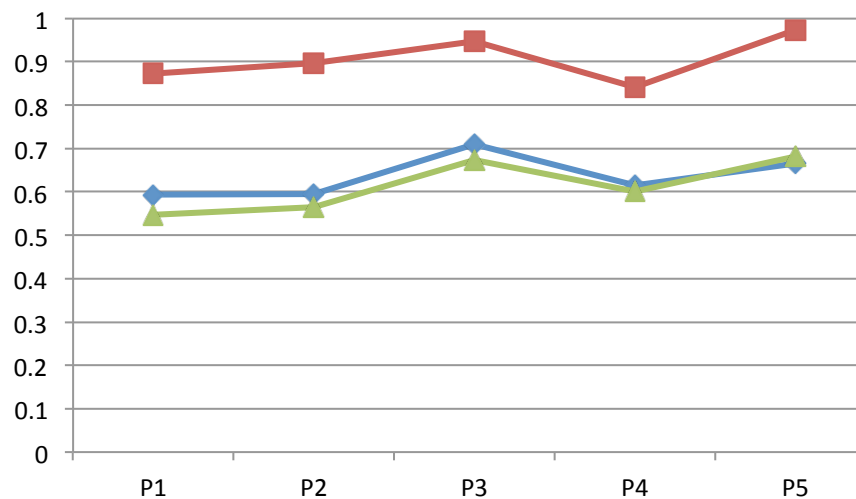

## INPP5FV2 HpB09

### MALDI-TOF MS

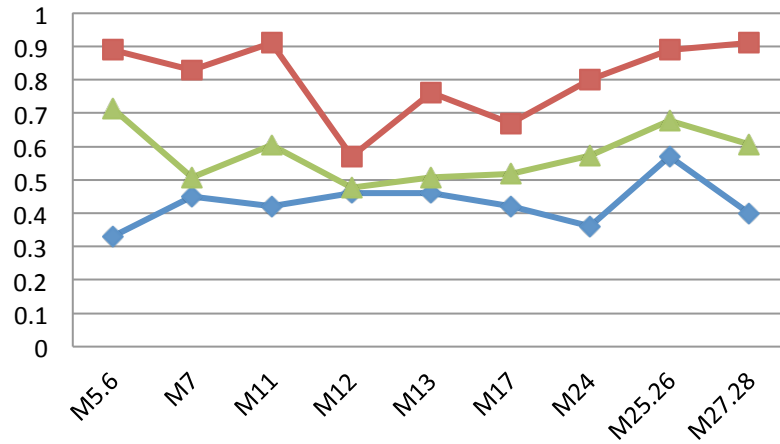

### Pyrosequencing

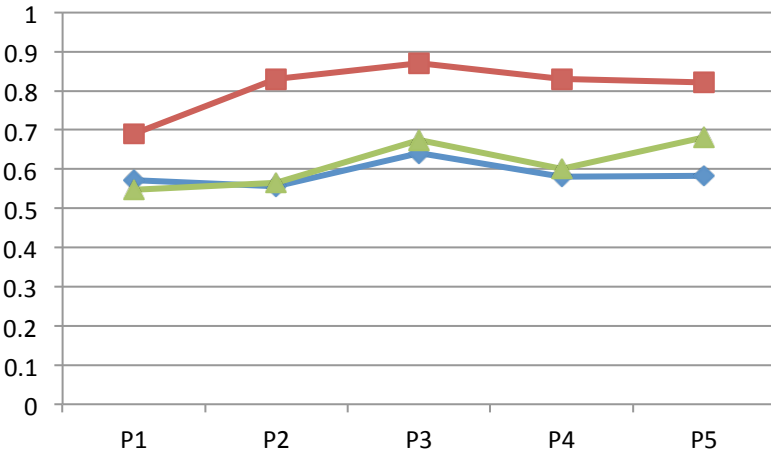

## INPP5FV2 HpB11

### MALDI-TOF MS

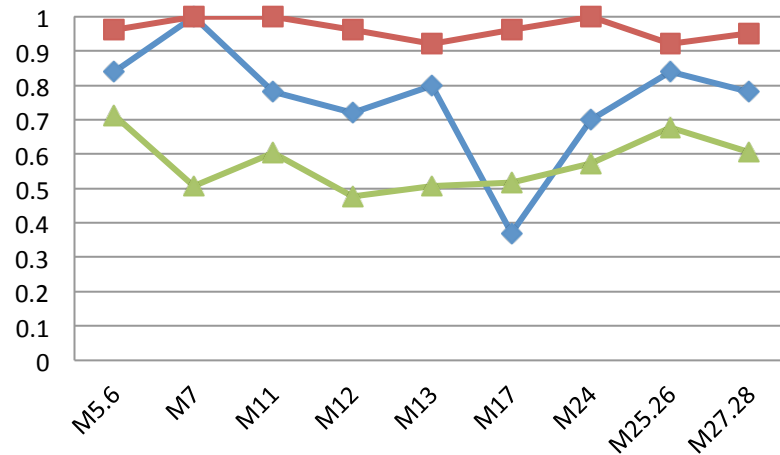

### Pyrosequencing

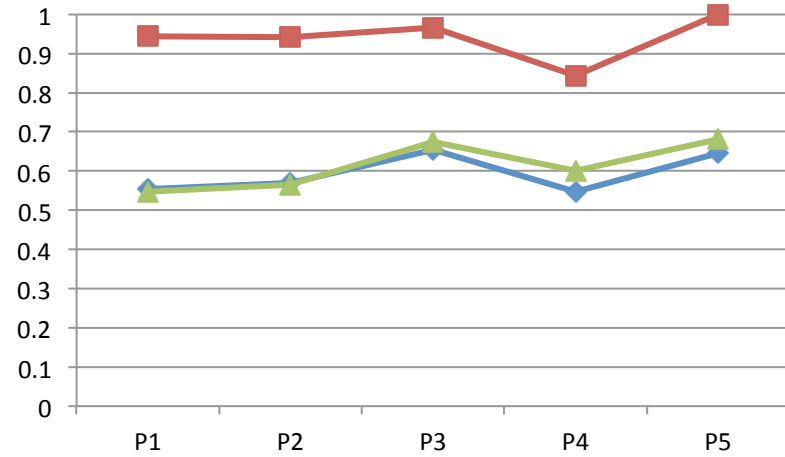

# H19 promoter HpB05

## MALDI-TOF MS

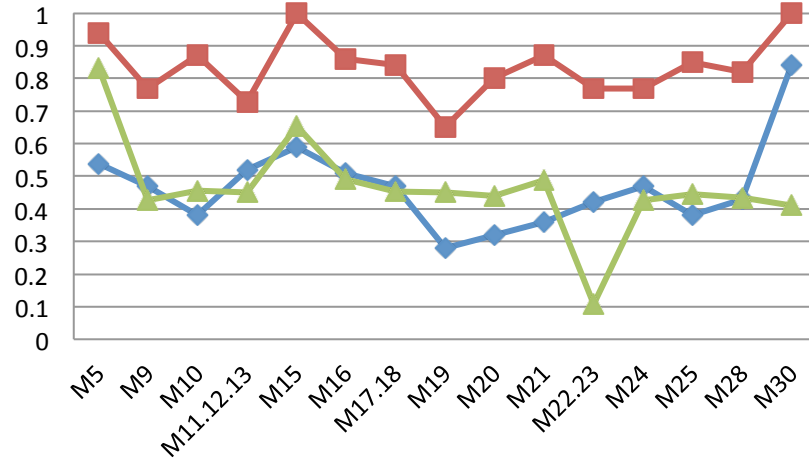

## Pyrosequencing

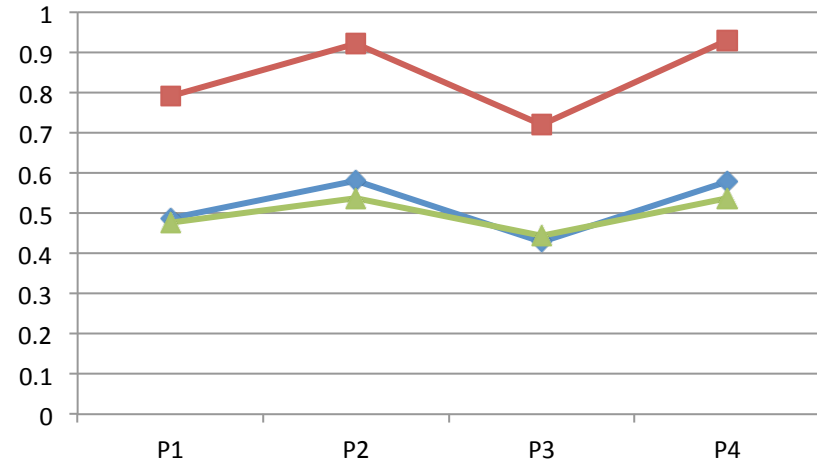

# H19-DMR HpB04

## MALDI-TOF MS

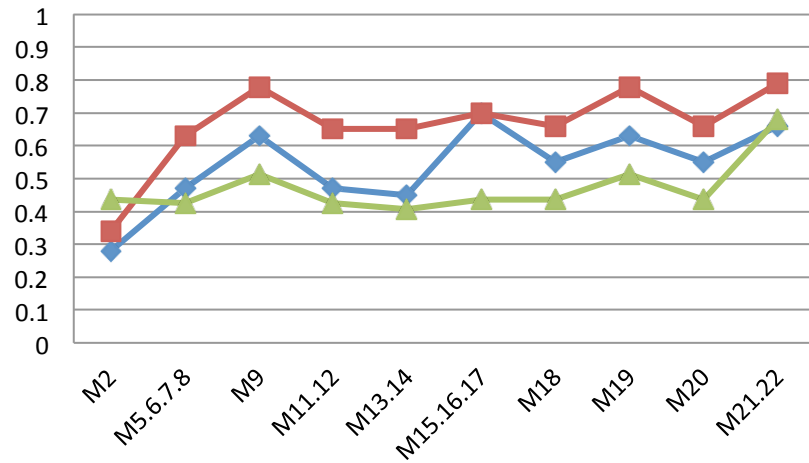

## Pyrosequencing

NA  
(see Supplementary Fig.3)

# H19-DMR HpB05

## MALDI-TOF MS

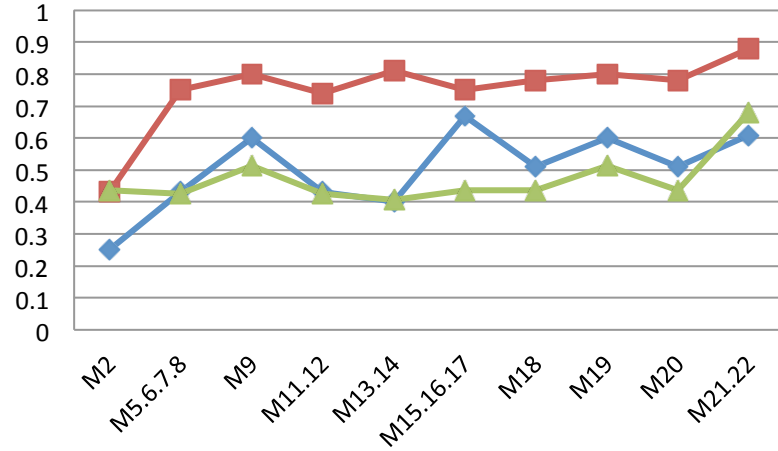

## Pyrosequencing

NA  
(see Supplementary Fig.3)

# IGF2DMR0 HpB06

## MALDI-TOF MS

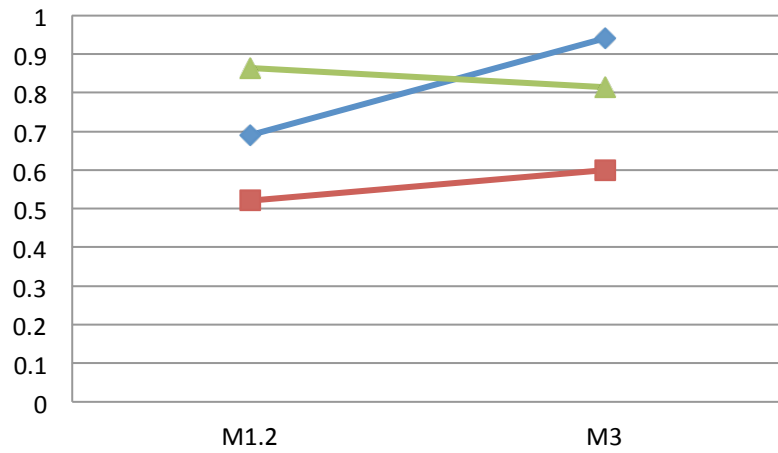

## Pyrosequencing

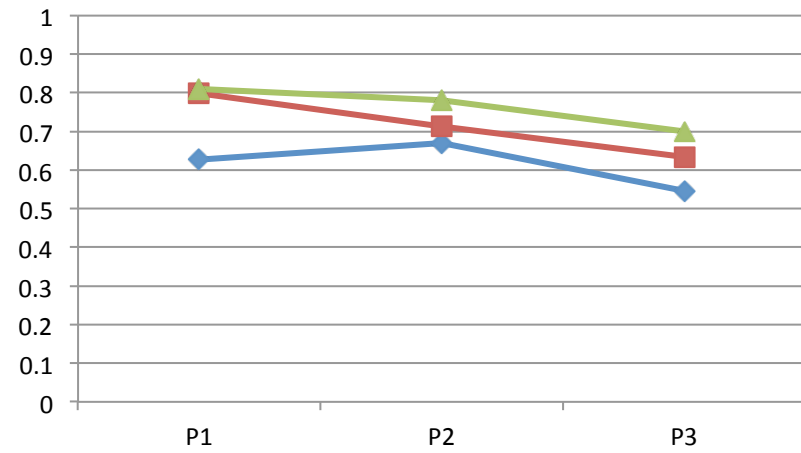



## IGF2DMR0 HpB09

### MALDI-TOF MS

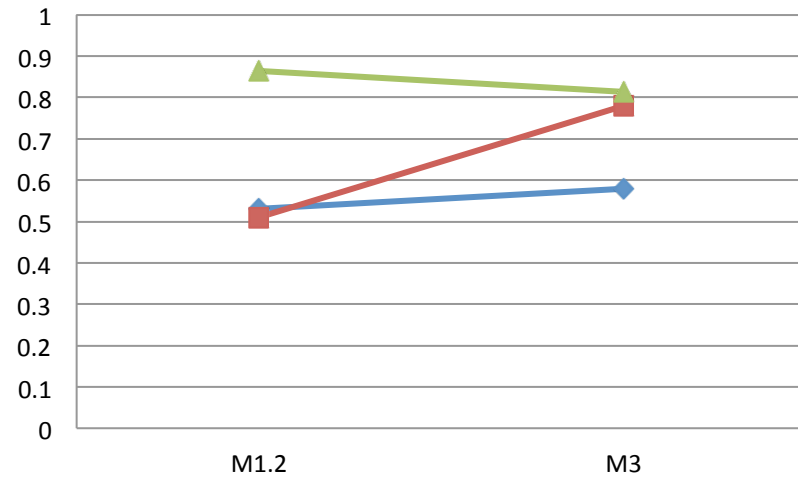

### Pyrosequencing

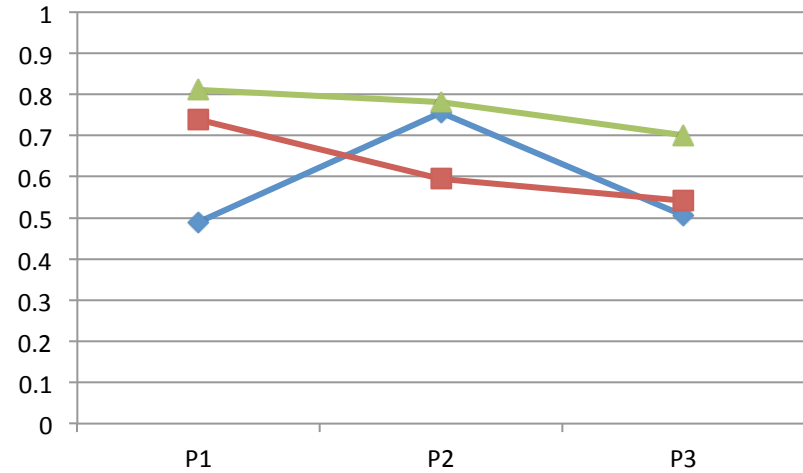

## IGF2DMR0 HpB10

### MALDI-TOF MS

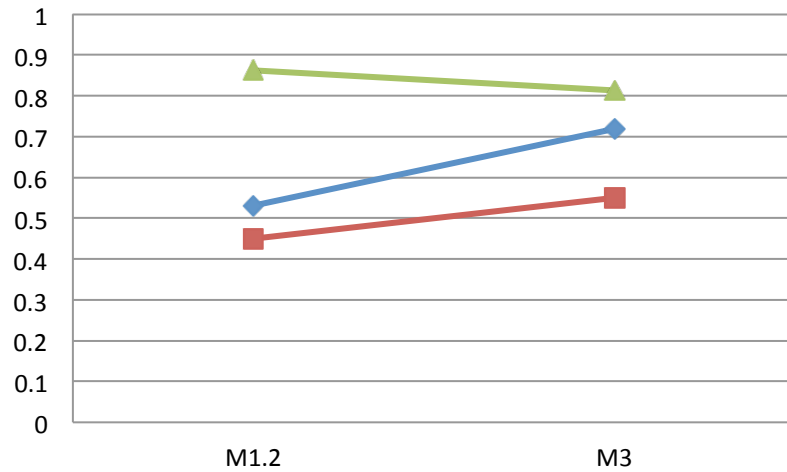

### Pyrosequencing

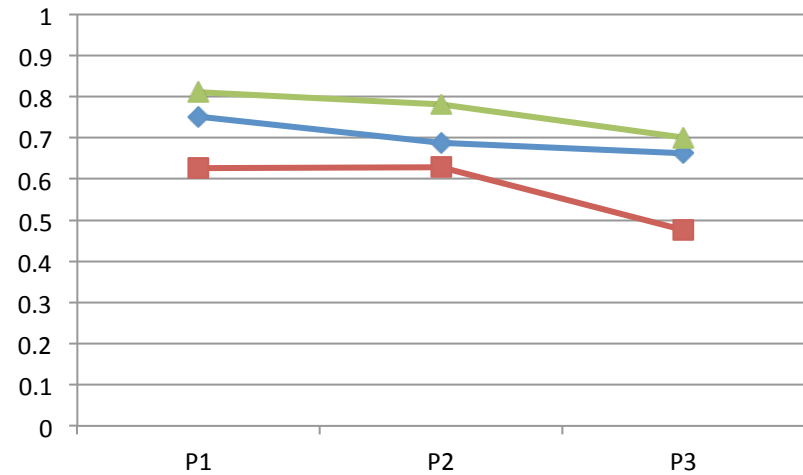

## IGF2DMR2 HpB05

### MALDI-TOF MS

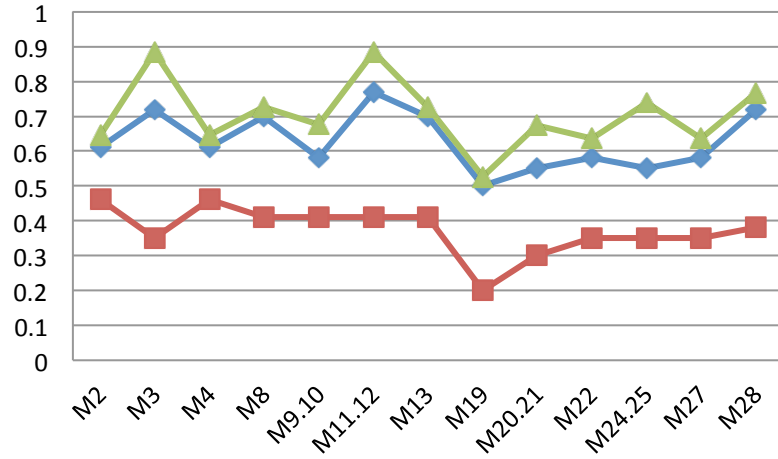

### Pyrosequencing

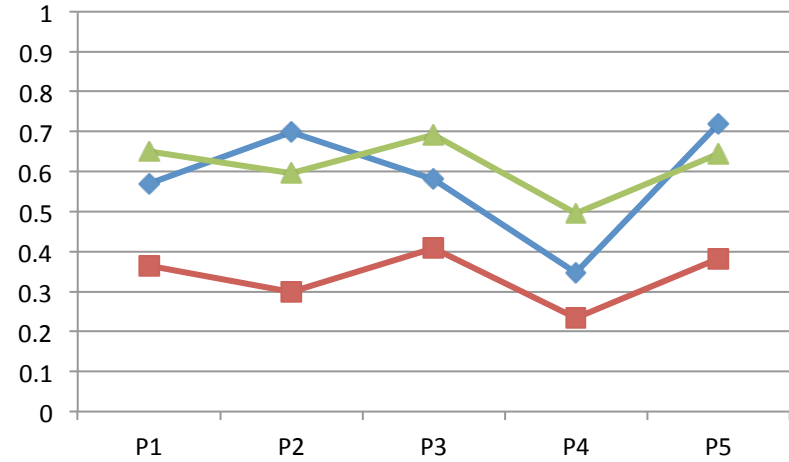

## IGF2DMR2 HpB09

### MALDI-TOF MS

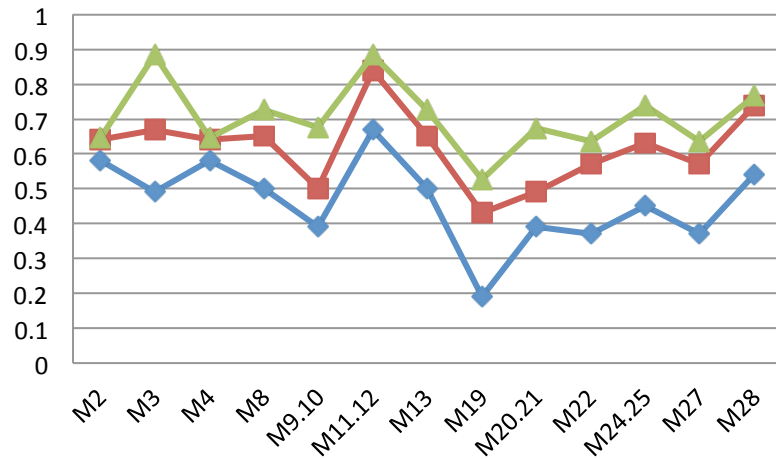

### Pyrosequencing

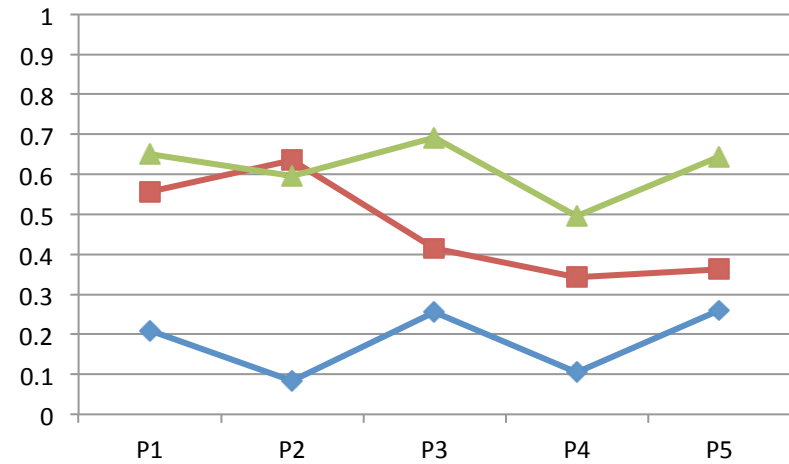

## KvDMR1 HpB05

### MALDI-TOF MS

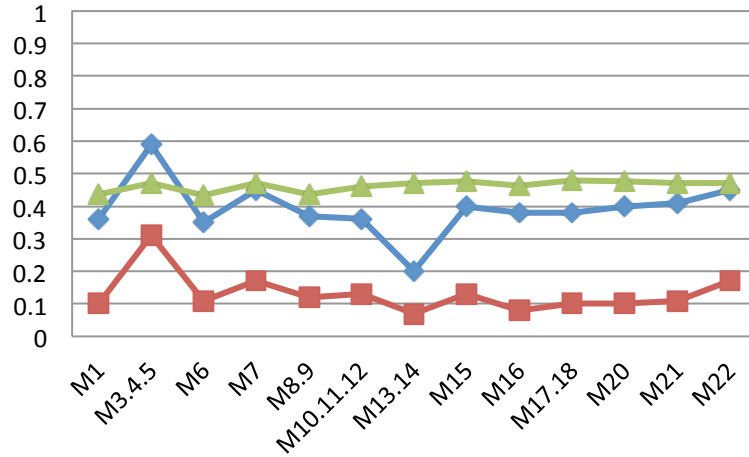

### Pyrosequencing

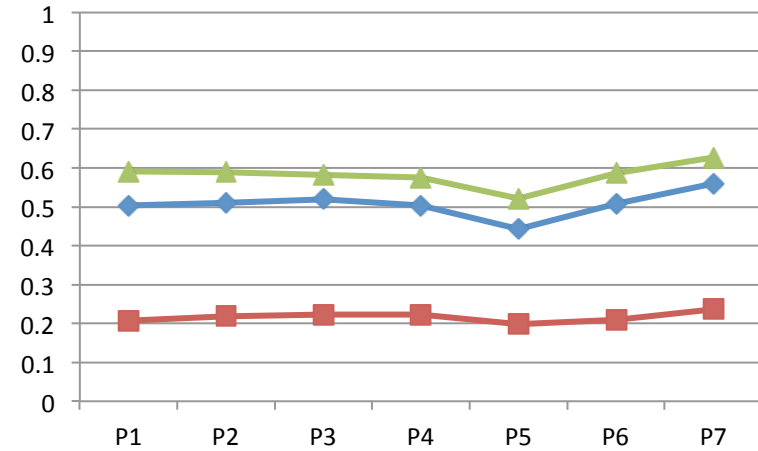

## KvDMR1 HpB07

### MALDI-TOF MS

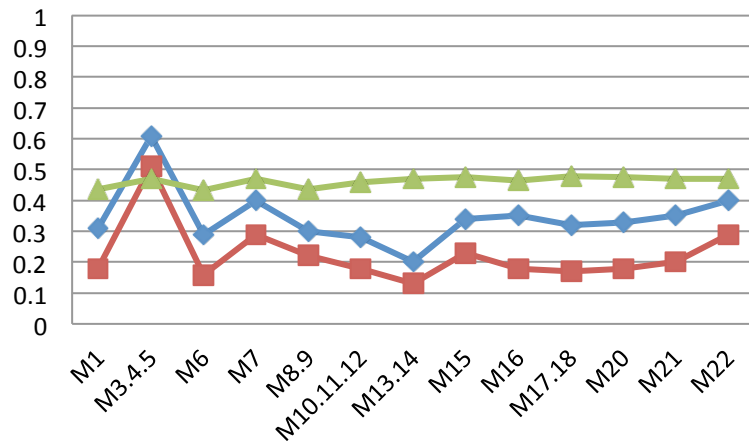

### Pyrosequencing

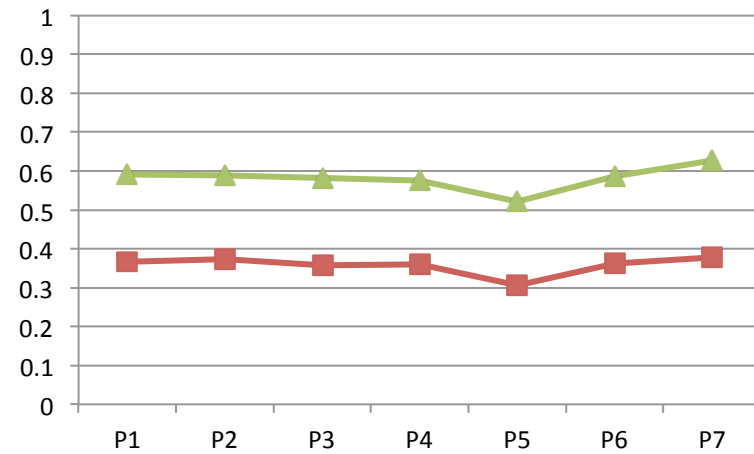

# KvDMR1 HpB08

## MALDI-TOF MS

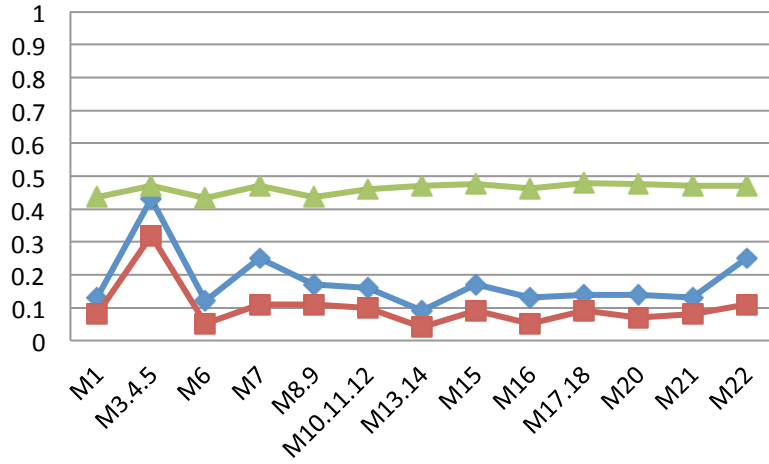

## Pyrosequencing

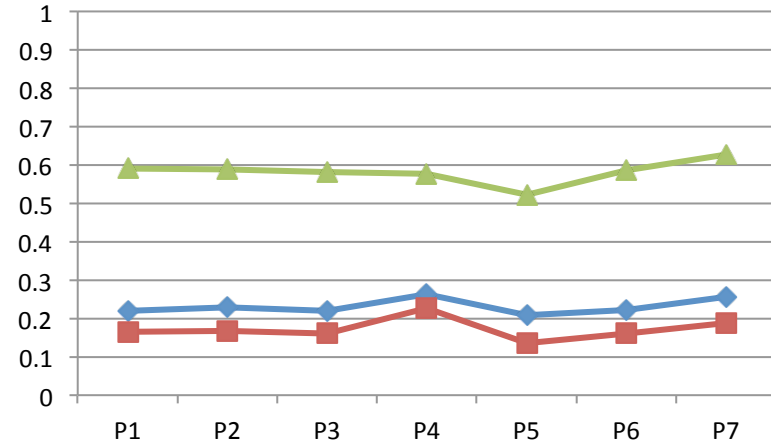

# WT1AS HpB02

## MALDI-TOF MS

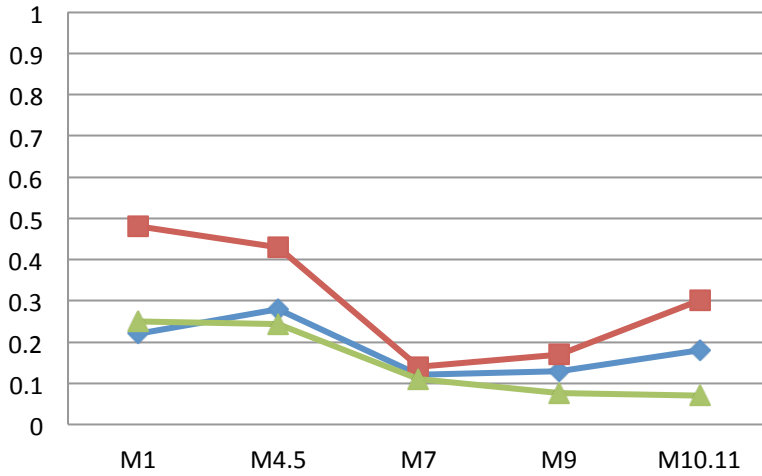

## Pyrosequencing

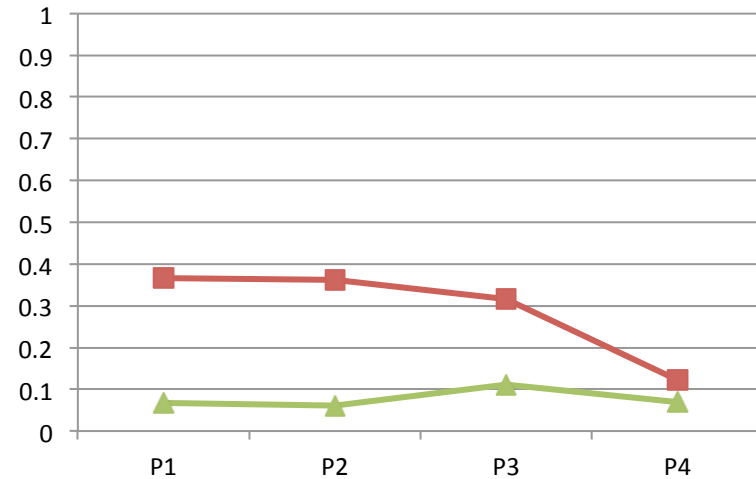

## RB1 HpB01

### MALDI-TOF MS

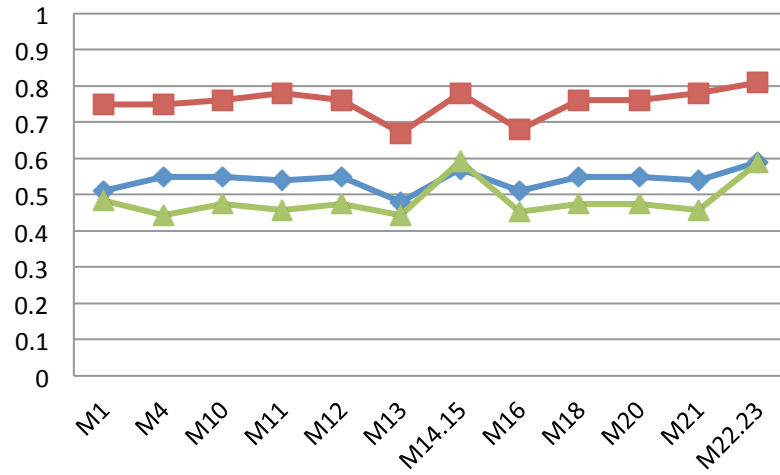

### Pyrosequencing

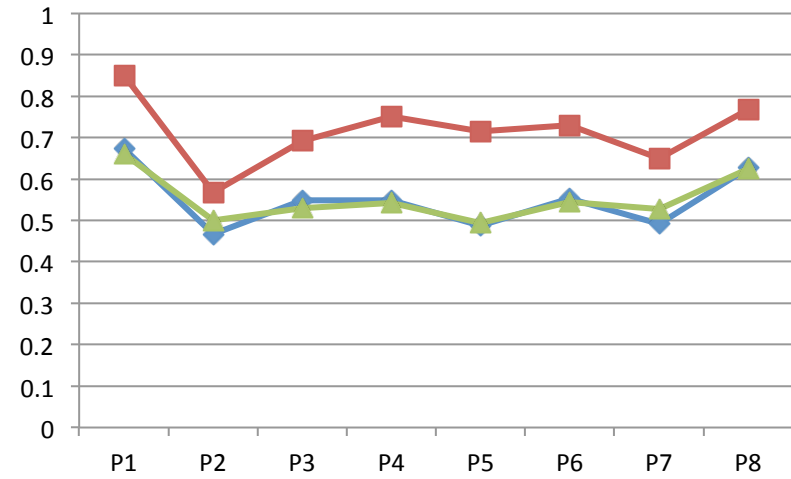

## RB1 HpB05

### MALDI-TOF MS

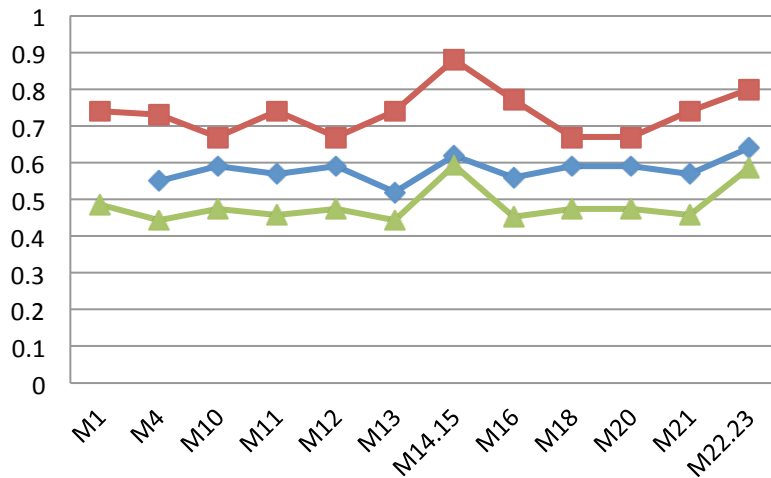

### Pyrosequencing

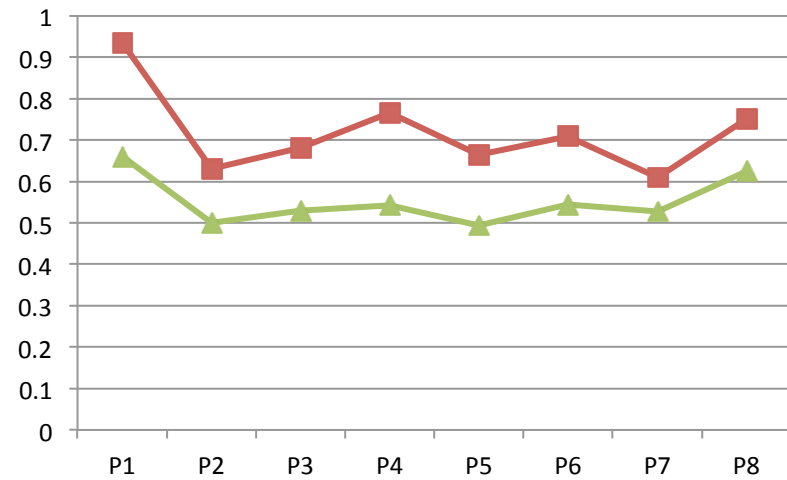

# RB1 HpB10

## MALDI-TOF MS

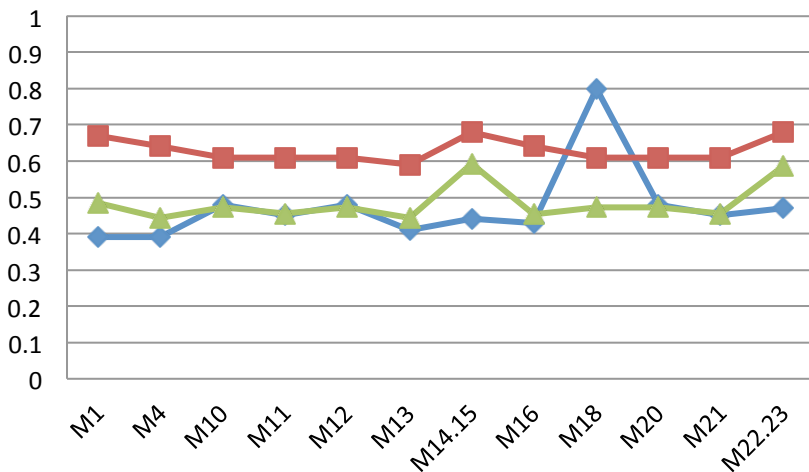

## Pyrosequencing

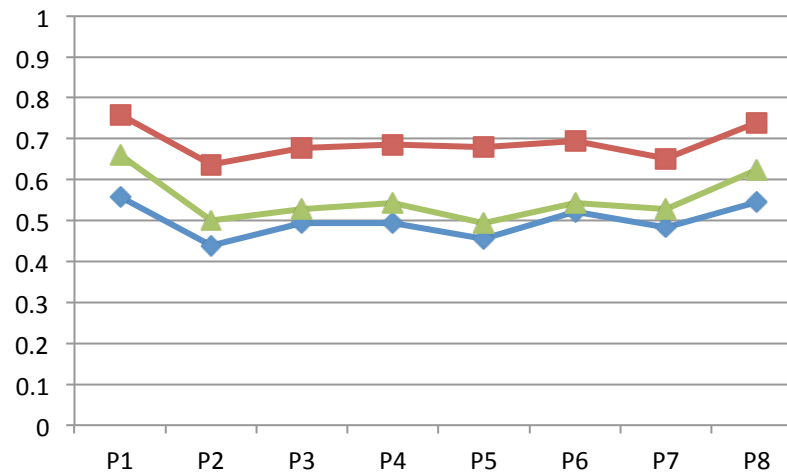

# RB1 HpB11

## MALDI-TOF MS

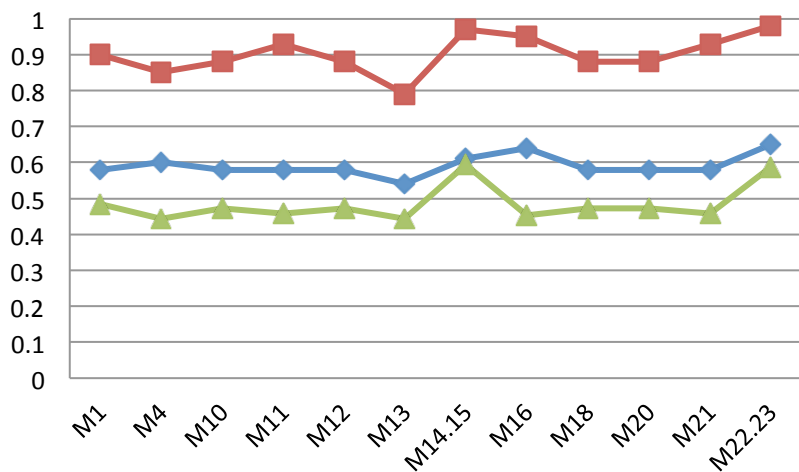

## Pyrosequencing

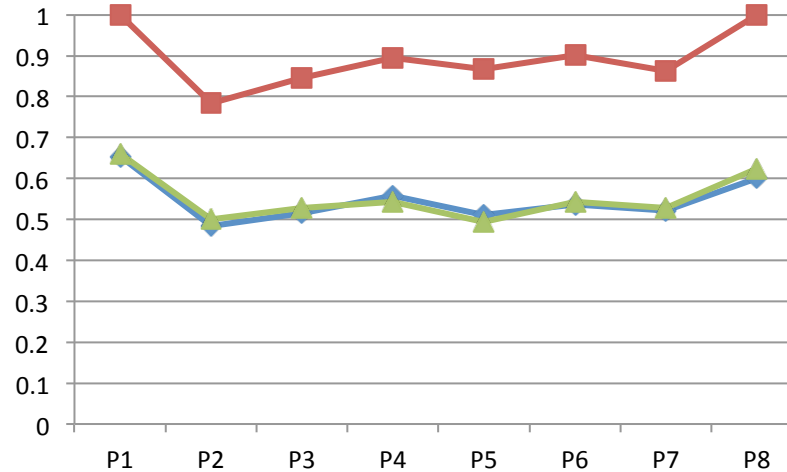

# RB1 BWS109

## MALDI-TOF MS

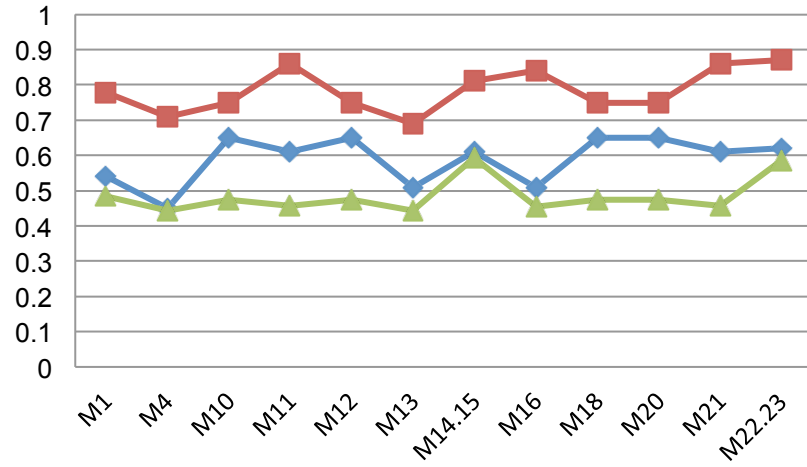

## Pyrosequencing

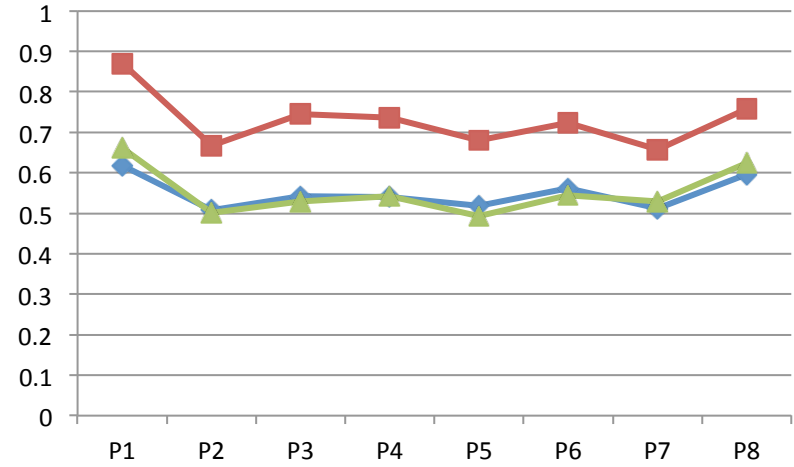

# IG-DMR-CG4 HpB06

## MALDI-TOF MS

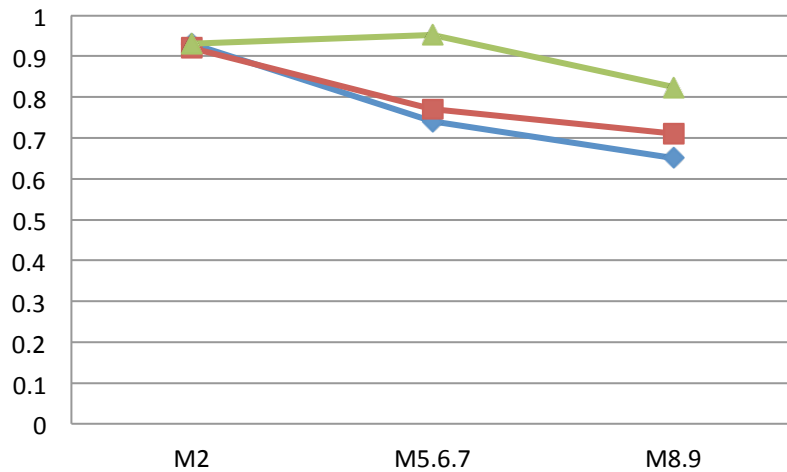

## Pyrosequencing

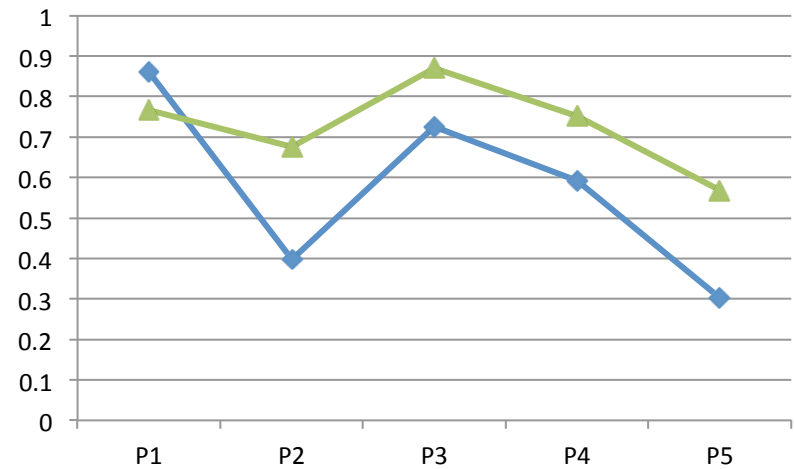

# IG-DMR-CG4 HpB11

## MALDI-TOF MS

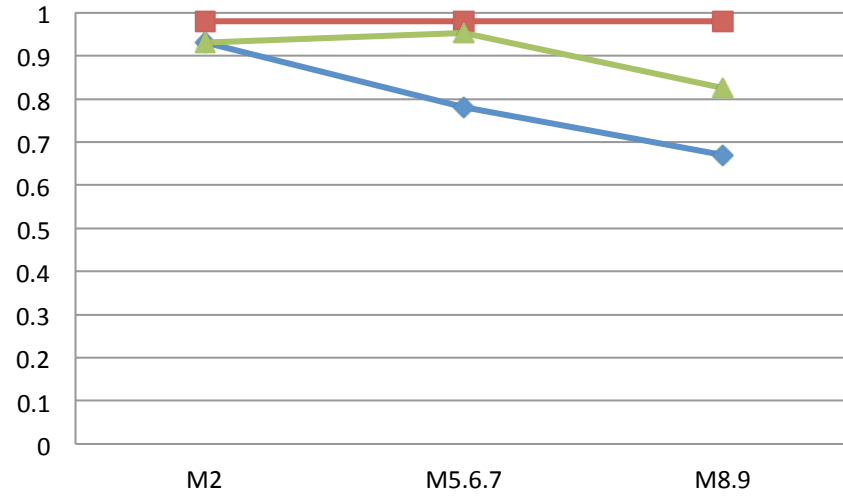

## Pyrosequencing

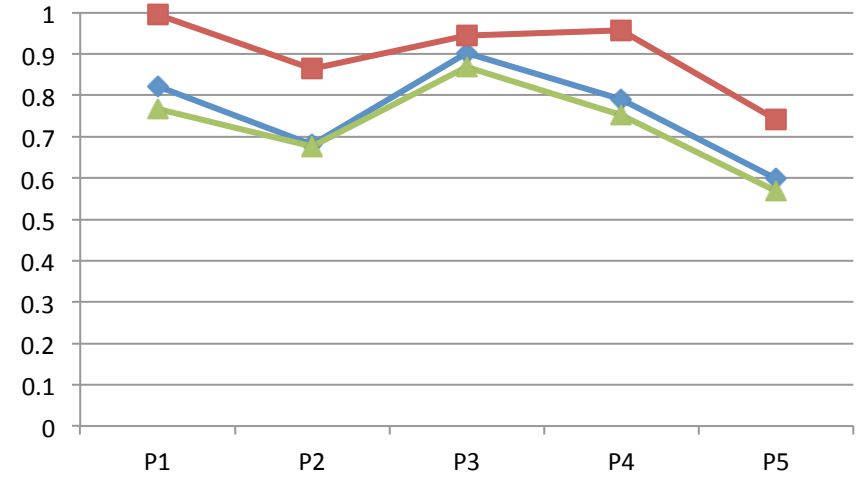

# MEG3CG7 HpB11

## MALDI-TOF MS

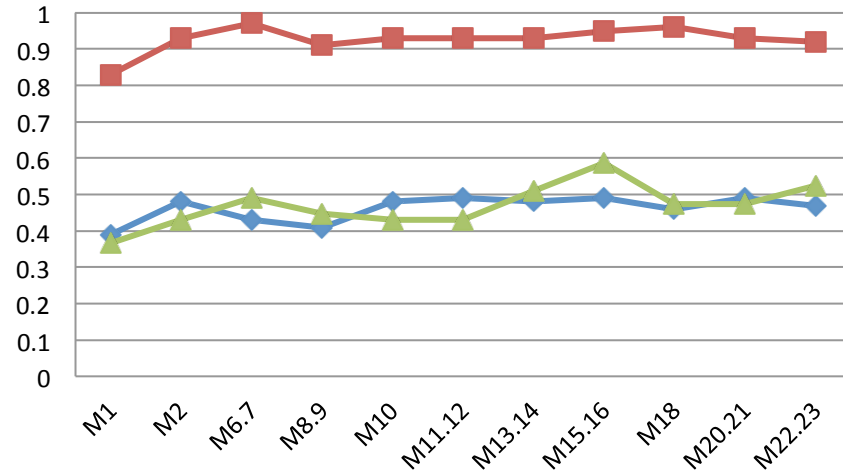

## Pyrosequencing

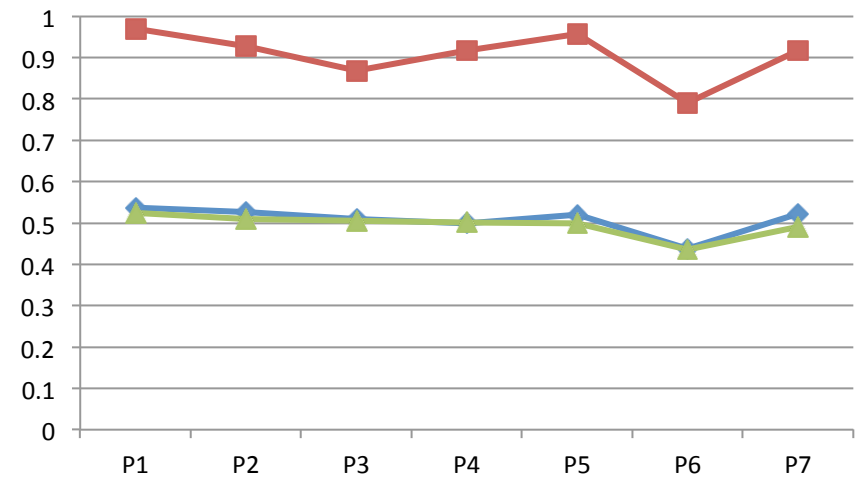



# MCTS2 HpB03

## MALDI-TOF MS

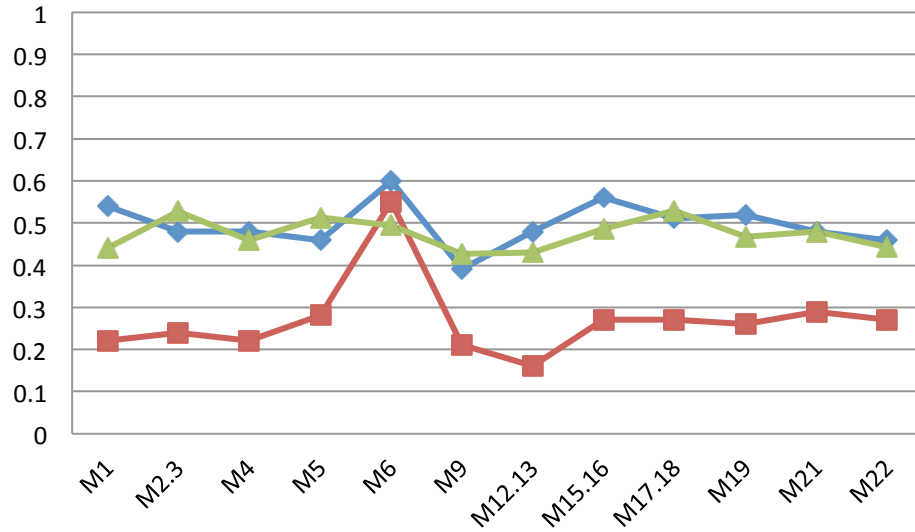

## Pyrosequencing

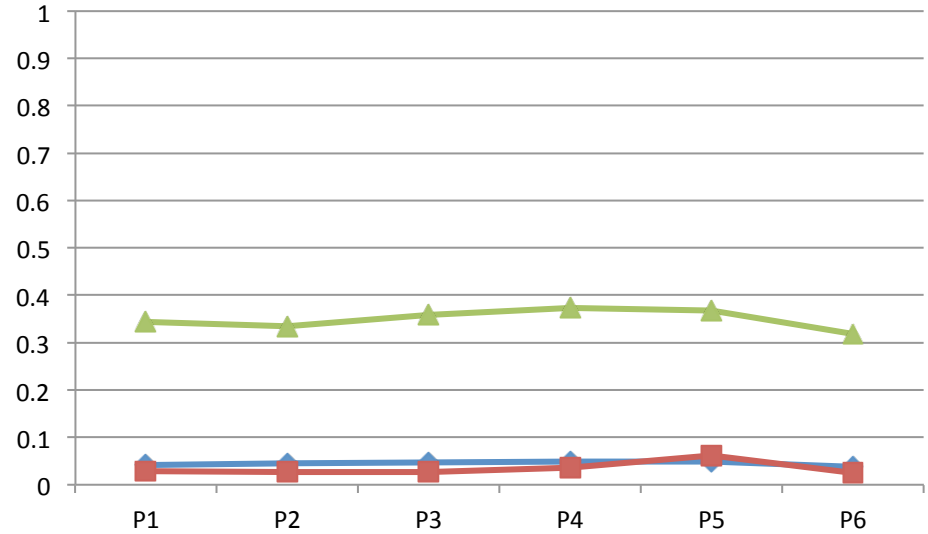

# NESP55 HpB09

## MALDI-TOF MS

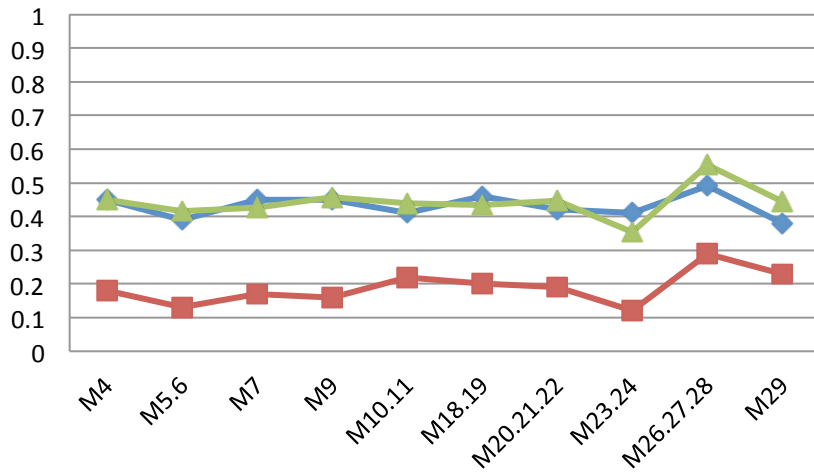

## Pyrosequencing

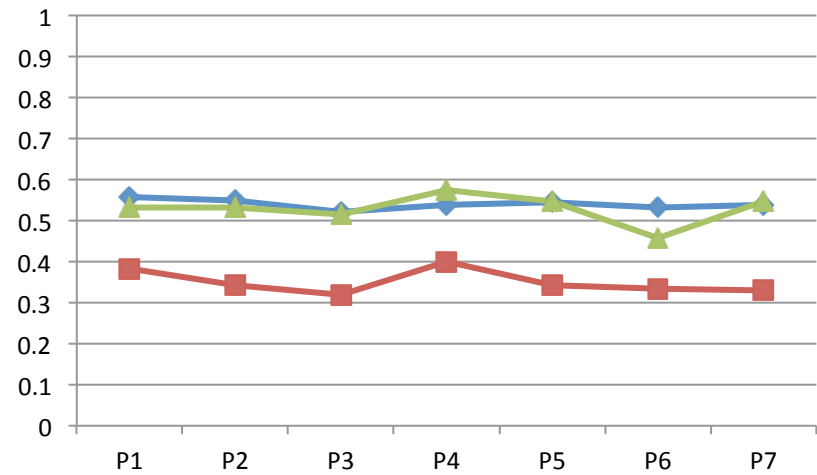

# GNASXL HpB01

## MALDI-TOF MS

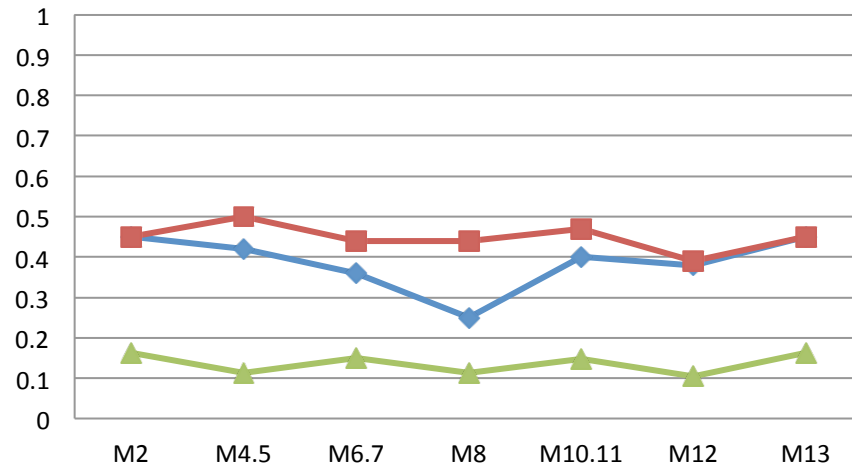

## Pyrosequencing

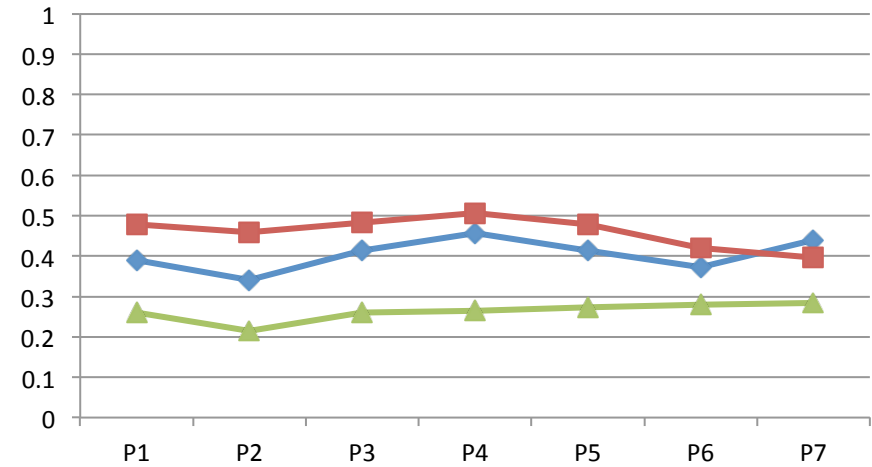

# GNASXL HpB04

## MALDI-TOF MS

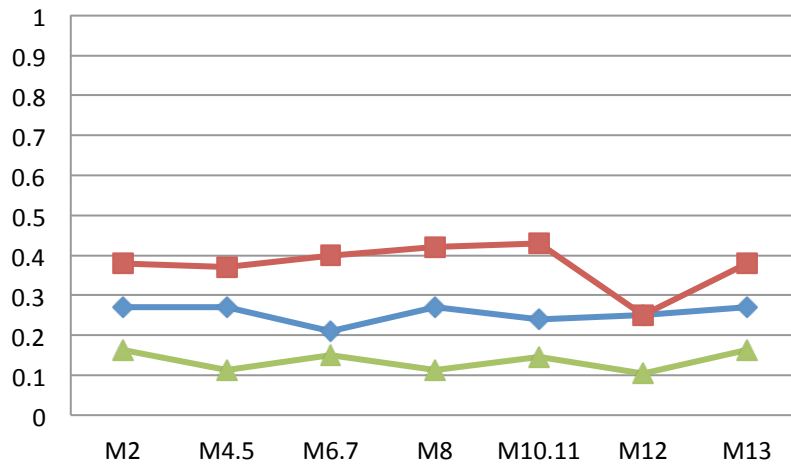

## Pyrosequencing

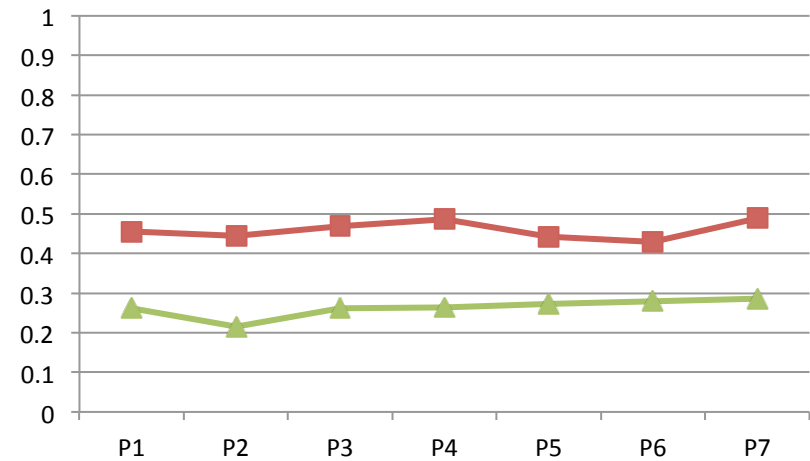

# GNASXL HpB06

## MALDI-TOF MS

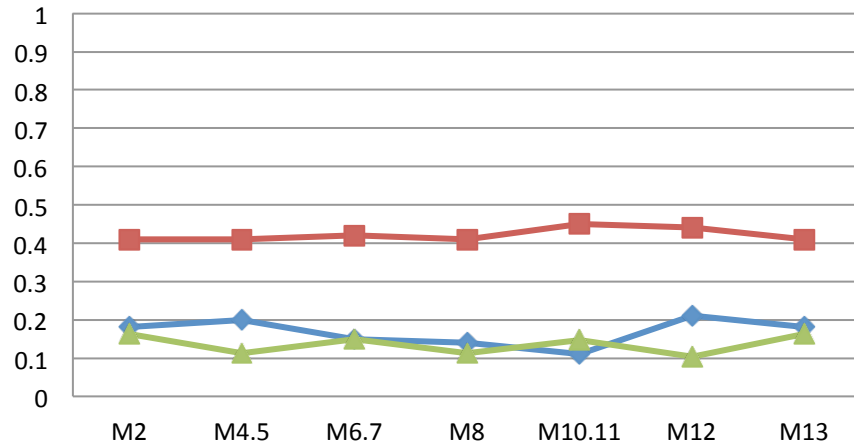

## Pyrosequencing

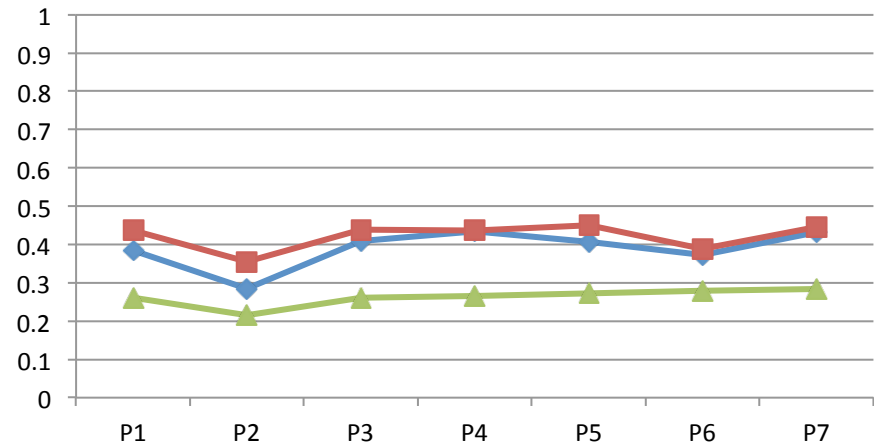

# GNASXL BWS109

## MALDI-TOF MS

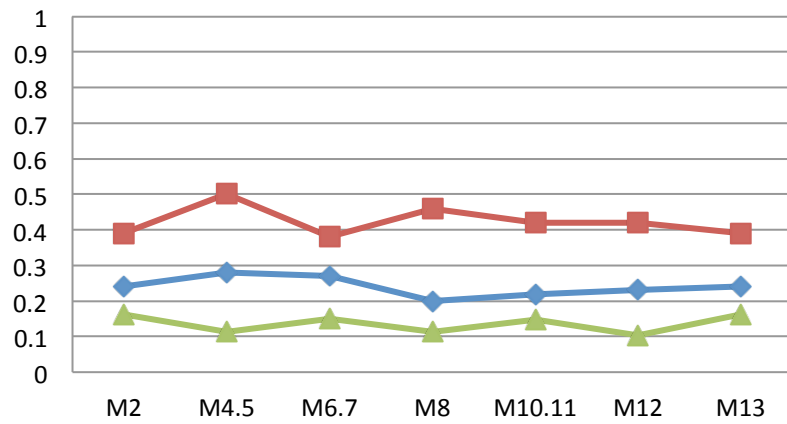

## Pyrosequencing

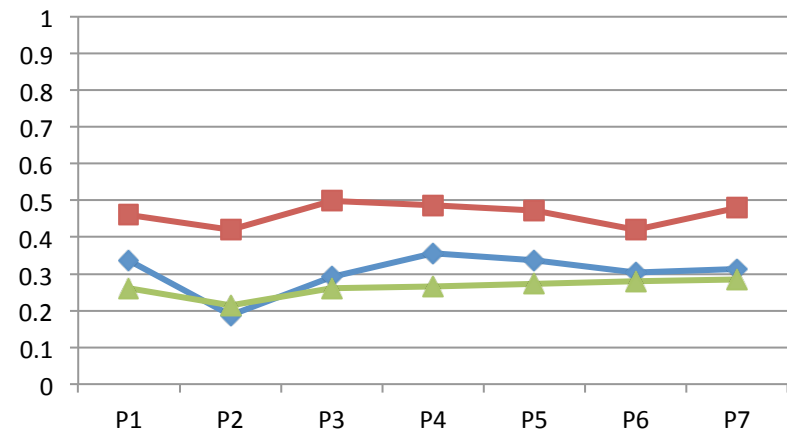

# GNAS1A HpB09

## MALDI-TOF MS

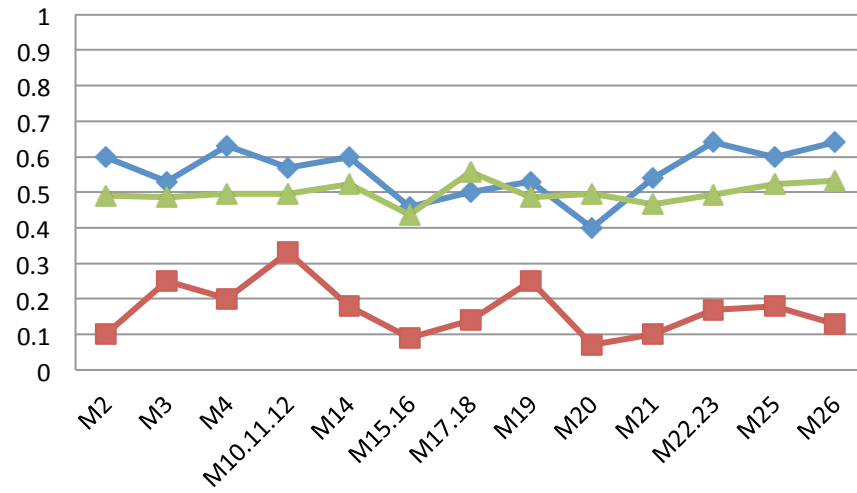

## Pyrosequencing

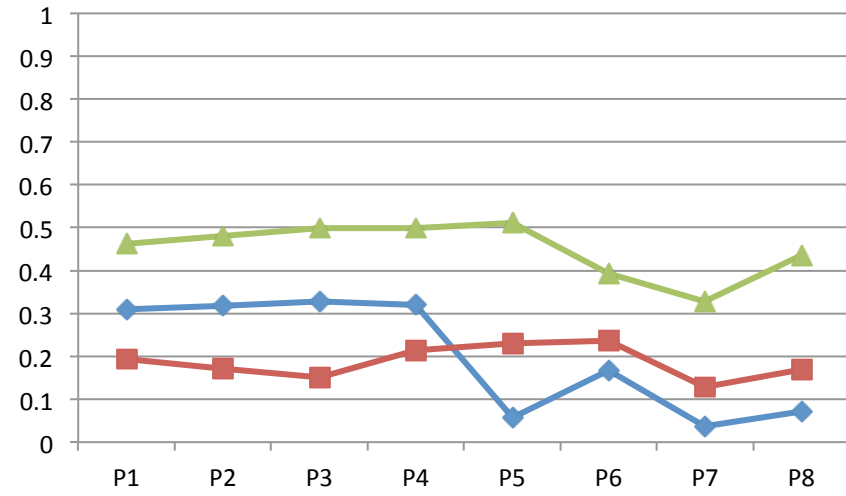

Supplement: MOESM3 [file 9465826]
